# Supplementary material
Source: Springer Nature journal article supplement (https://www.springermedizin.de/resource/supplementary/12890_2012_359_MOESM4_ESM.pdf/9505008)

(A) Patients with WHO FC I at baseline

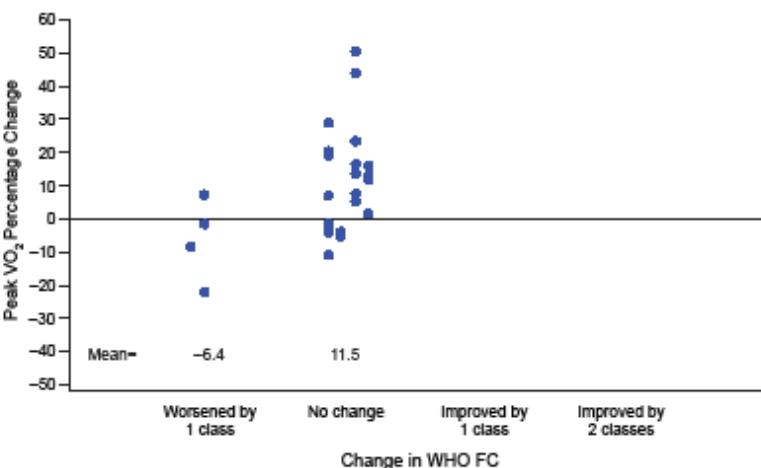

(B) Patients with WHO FC II at baseline

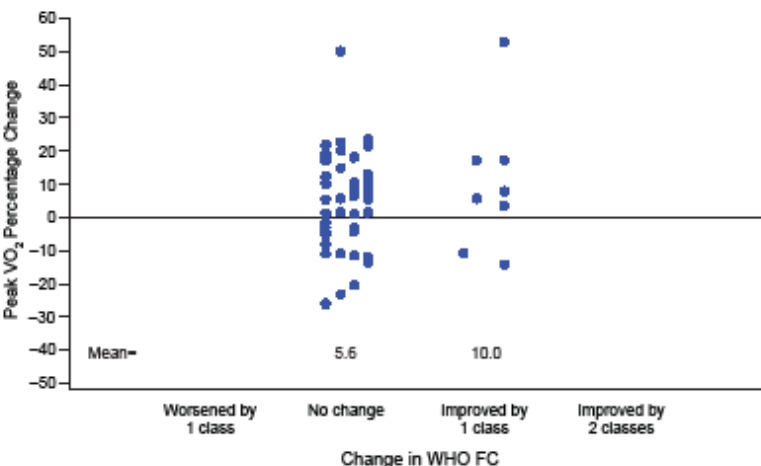

(C) Patients with WHO FC III at baseline

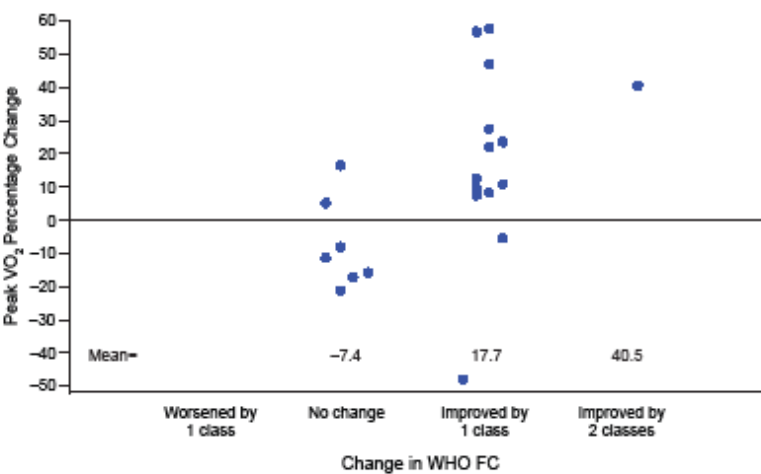

Supplement: MOESM4 [file 9505008]
